# Supplementary material for: Triazolate-based 3D frameworks and a 2D layer with centrosymmetric CuII7, CuII5, CuII4 clusters and tunable interlayer/interchain compactness: hydrothermal syntheses, crystal structures and magnetic properties
Source: Royal Society of Chemistry journal article supplement (doi:10.1039/c4dt04013a), 2015-01-01
Supplement: c4dt04013a1.pdf [file c4dt04013a1.pdf]

## Supporting Information

### Triazolate-based 3D frameworks and 2D layer with centrosymmetric Cu<sup>II</sup><sub>7</sub>, Cu<sup>II</sup><sub>5</sub>, Cu<sup>II</sup><sub>4</sub> clusters and tunable interlayer/interchain compactness: Hydrothermal syntheses, crystal structures and magnetic properties

Yuan-Yuan Zhang,<sup>a</sup> Hong Zhao,<sup>a</sup> En-Cui Yang,<sup>a,\*</sup> Zhong-Yi Liu,<sup>a</sup> Qiu Shang<sup>a</sup> and Xiao-Jun Zhao <sup>a, b \*</sup>

<sup>a</sup> College of Chemistry, Key Laboratory of Inorganic-Organic Hybrid Functional Material Chemistry, Ministry of Education, Tianjin Key Laboratory of Structure and Performance for Functional Molecules, Tianjin Normal University, Tianjin 300387, P. R. China

<sup>b</sup> Collaborative Innovation Center of Chemical Science and Engineering (Tianjin), Tianjin 300071, China

**Table S1** Selected bond lengths (Å) and angles (°) for **1**<sup>a</sup>

|                                              |            |                                              |            |
|----------------------------------------------|------------|----------------------------------------------|------------|
| Cu(1)–O(10)                                  | 1.922(4)   | Cu(2)–O(2) <sup>#5</sup>                     | 2.294(4)   |
| Cu(1)–O(1)                                   | 1.937(4)   | Cu(3)–O(10)                                  | 1.898(4)   |
| Cu(1)–O(7) <sup>#1</sup>                     | 1.968(4)   | Cu(3)–N(2)                                   | 1.983(5)   |
| Cu(1)–N(1)                                   | 1.974(5)   | Cu(3)–N(6)                                   | 1.986(5)   |
| Cu(1)–O(7) <sup>#2</sup>                     | 2.352(4)   | Cu(3)–O(9) <sup>#3</sup>                     | 2.008(4)   |
| Cu(2)–N(3) <sup>#3</sup>                     | 1.959(4)   | Cu(4)–N(5)                                   | 1.931(5)   |
| Cu(2)–O(4) <sup>#4</sup>                     | 1.963(4)   | Cu(4)–O(9)                                   | 1.968(4)   |
| Cu(2)–N(4)                                   | 1.986(4)   | Cu(5)–O(5) <sup>#6</sup>                     | 1.908(4)   |
| Cu(2)–O(9)                                   | 2.040(4)   | Cu(5)–O(3) <sup>#7</sup>                     | 1.969(4)   |
| O(10)–Cu(1)–O(7) <sup>#2</sup>               | 98.46(16)  | N(3) <sup>#3</sup> –Cu(2)–O(2) <sup>#5</sup> | 93.21(16)  |
| O(10)–Cu(1)–O(7) <sup>#1</sup>               | 88.02(16)  | O(4) <sup>#4</sup> –Cu(2)–O(2) <sup>#5</sup> | 90.61(16)  |
| O(1)–Cu(1)–O(7) <sup>#1</sup>                | 88.35(15)  | N(4)–Cu(2)–O(2) <sup>#5</sup>                | 83.85(16)  |
| O(10)–Cu(1)–N(1)                             | 86.65(17)  | O(9)–Cu(2)–O(2) <sup>#5</sup>                | 118.96(16) |
| O(1)–Cu(1)–N(1)                              | 97.02(17)  | O(10)–Cu(3)–N(2)                             | 84.87(17)  |
| O(1)–Cu(1)–O(7) <sup>#2</sup>                | 80.10(15)  | O(10)–Cu(3)–N(6)                             | 96.71(17)  |
| O(7) <sup>#1</sup> –Cu(1)–O(7) <sup>#2</sup> | 77.93(15)  | N(2)–Cu(3)–O(9) <sup>#3</sup>                | 86.12(16)  |
| N(1)–Cu(1)–O(7) <sup>#2</sup>                | 107.12(16) | N(6) <sup>#5</sup> –Cu(3)–O(9) <sup>#3</sup> | 91.99(17)  |
| N(3) <sup>#3</sup> –Cu(2)–O(4) <sup>#4</sup> | 96.59(17)  | N(5)–Cu(4)–O(9)                              | 89.35(17)  |
| N(4)–Cu(2)–O(9)                              | 88.95(16)  | N(5) <sup>#3</sup> –Cu(4)–O(9)               | 90.65(17)  |
| O(4) <sup>#4</sup> –Cu(2)–N(4)               | 89.14(18)  | O(5) <sup>#6</sup> –Cu(5)–O(3)               | 91.38(17)  |
| N(3) <sup>#3</sup> –Cu(2)–O(9)               | 87.50(16)  | O(5) <sup>#2</sup> –Cu(5)–O(3)               | 88.62(17)  |
| O(4) <sup>#4</sup> –Cu(2)–O(9)               | 149.96(17) | O(5) <sup>#2</sup> –Cu(5)–O(3) <sup>#7</sup> | 91.37(17)  |

<sup>a</sup> Symmetry codes: <sup>#1</sup> 1 – x, 1 – y, 2 – z; <sup>#2</sup> x + 1, y, z; <sup>#3</sup> 3 – x, 2 – y, 2 – z; <sup>#4</sup> 1 + x, y, 1 + z. <sup>#5</sup> 2 – x, 2 – y, 2 – z; <sup>#6</sup> 1 – x, 1 – y, 1 – z; <sup>#7</sup> 2 – x, 1 – y, 1 – z.

**Table S2** Selected bond lengths (Å) and angles (°) for **2**<sup>a</sup>

|                                              |            |                                              |            |
|----------------------------------------------|------------|----------------------------------------------|------------|
| Cu(1)–N(5)                                   | 1.978(4)   | Cu(2)–N(6)                                   | 2.012(4)   |
| Cu(1)–N(1)                                   | 1.980(4)   | Cu(2)–N(8)                                   | 2.166(3)   |
| Cu(1)–N(11)                                  | 1.987(5)   | Cu(3)–N(2)                                   | 1.920(4)   |
| Cu(1)–O(1)                                   | 2.030(3)   | Cu(3)–O(1)                                   | 1.964(3)   |
| Cu(1)–O(2)                                   | 2.190(9)   | Cu(3)–N(9)                                   | 2.459(4)   |
| Cu(2)–N(7) <sup>#1</sup>                     | 1.917(2)   | Cu(4)–N(12)                                  | 1.979(5)   |
| Cu(2)–O(1)                                   | 1.995(3)   | Cu(4)–N(4)                                   | 2.011(4)   |
| Cu(2)–N(3) <sup>#2</sup>                     | 2.008(4)   | Cu(4)–O(3)                                   | 2.418(7)   |
| N(5)–Cu(1)–N(11)                             | 90.96(19)  | O(1) <sup>#2</sup> –Cu(3)–N(9)               | 101.43(16) |
| N(1)–Cu(1)–N(11)                             | 91.01(19)  | N(2) <sup>#2</sup> –Cu(3)–O(1)               | 89.13(15)  |
| N(5)–Cu(1)–O(1)                              | 86.03(16)  | N(2)–Cu(3)–O(1)                              | 90.87(15)  |
| N(1)–Cu(1)–O(1)                              | 91.11(16)  | N(2) <sup>#2</sup> –Cu(3)–N(9) <sup>#2</sup> | 89.6(5)    |
| O(1)–Cu(1)–O(2)                              | 81.3(2)    | N(2)–Cu(3)–N(9) <sup>#2</sup>                | 90.4(5)    |
| N(5)–Cu(1)–O(2)                              | 91.6(3)    | O(1)–Cu(3)–N(9) <sup>#2</sup>                | 101.4(4)   |
| N(1)–Cu(1)–O(2)                              | 89.5(3)    | O(1) <sup>#2</sup> –Cu(3)–N(9) <sup>#2</sup> | 78.6(4)    |
| N(11)–Cu(1)–O(2)                             | 123.3(2)   | N(2) <sup>#2</sup> –Cu(3)–N(9)               | 90.44(18)  |
| N(3) <sup>#2</sup> –Cu(2)–N(8)               | 86.56(19)  | N(2)–Cu(3)–N(9)                              | 89.56(18)  |
| O(1)–Cu(2)–N(8)                              | 84.91(13)  | O(1)–Cu(3)–N(9)                              | 78.57(16)  |
| N(7) <sup>#1</sup> –Cu(2)–N(3) <sup>#2</sup> | 90.22(16)  | N(4)–Cu(4)–O(3)                              | 94.0(2)    |
| O(1)–Cu(2)–N(3) <sup>#2</sup>                | 90.02(15)  | N(12)–Cu(4)–N(4)                             | 90.07(19)  |
| N(7) <sup>#1</sup> –Cu(2)–N(6)               | 90.25(16)  | N(12)–Cu(4)–N(4) <sup>#3</sup>               | 89.93(19)  |
| O(1)–Cu(2)–N(6)                              | 87.71(15)  | N(12)–Cu(4)–O(3) <sup>#3</sup>               | 84.9(2)    |
| N(7) <sup>#1</sup> –Cu(2)–N(8)               | 108.42(9)  | N(4)–Cu(4)–O(3) <sup>#3</sup>                | 86.0(2)    |
| N(6)–Cu(2)–N(8)                              | 100.71(19) | N(12)–Cu(4)–O(3)                             | 95.1(2)    |

<sup>a</sup> Symmetry codes: <sup>#1</sup>  $-x, 1-y, -z$ ; <sup>#2</sup>  $1-x, 1-y, -z$ ; <sup>#3</sup>  $-x, 1-y, 1-z$ .

**Table S3** Selected bond lengths (Å) and angles (°) for **3**<sup>a</sup>

|                                              |            |                                              |            |
|----------------------------------------------|------------|----------------------------------------------|------------|
| Cu(1)–N(2)                                   | 1.974(5)   | Cu(4)–O(10)                                  | 1.953(3)   |
| Cu(1)–O(9)                                   | 1.977(3)   | Cu(4)–O(1)                                   | 1.968(3)   |
| Cu(1)–N(7)                                   | 2.006(5)   | Cu(4)–N(5)                                   | 1.984(4)   |
| Cu(1)–N(4)                                   | 2.047(4)   | Cu(4)–N(12) <sup>#3</sup>                    | 2.002(4)   |
| Cu(1)–O(1)                                   | 2.366(4)   | Cu(4)–N(3)                                   | 2.322(5)   |
| Cu(2)–O(6)                                   | 1.949(4)   | Cu(5)–N(11)                                  | 1.942(4)   |
| Cu(2)–O(7) <sup>#1</sup>                     | 1.988(4)   | Cu(5)–O(10)                                  | 1.949(3)   |
| Cu(2)–N(1)                                   | 1.989(4)   | Cu(6)–O(3) <sup>#4</sup>                     | 1.965(5)   |
| Cu(2)–N(9) <sup>#2</sup>                     | 2.017(4)   | Cu(6)–N(6)                                   | 1.980(4)   |
| Cu(2)–O(9)                                   | 2.304(4)   | Cu(6)–N(10)                                  | 1.994(4)   |
| Cu(3)–N(8)                                   | 1.947(5)   | Cu(6)–O(8) <sup>#5</sup>                     | 2.044(4)   |
| Cu(3)–O(9)                                   | 1.987(3)   | Cu(6)–O(10)                                  | 2.230(3)   |
| Cu(3)–O(5)                                   | 2.420(3)   |                                              |            |
| N(2)–Cu(1)–O(9)                              | 88.75(17)  | O(9)–Cu(3)–O(5)                              | 78.03(13)  |
| O(9)–Cu(1)–N(7)                              | 90.22(16)  | N(8) <sup>#2</sup> –Cu(3)–O(5) <sup>#2</sup> | 87.21(15)  |
| N(2)–Cu(1)–N(4)                              | 90.35(19)  | O(10)–Cu(4)–N(5)                             | 89.39(14)  |
| O(9)–Cu(1)–O(1)                              | 123.26(13) | O(1)–Cu(4)–N(5)                              | 90.15(15)  |
| N(7)–Cu(1)–N(4)                              | 93.08(19)  | O(10)–Cu(4)–N(12) <sup>#3</sup>              | 88.99(14)  |
| N(2)–Cu(1)–O(1)                              | 83.14(17)  | O(1)–Cu(4)–N(12) <sup>#3</sup>               | 90.49(15)  |
| N(7)–Cu(1)–O(1)                              | 92.70(16)  | O(10)–Cu(4)–N(3)                             | 100.52(16) |
| N(4)–Cu(1)–O(1)                              | 82.72(15)  | O(1)–Cu(4)–N(3)                              | 85.05(16)  |
| O(6)–Cu(2)–N(1)                              | 90.52(17)  | N(12) <sup>#3</sup> –Cu(4)–N(3)              | 105.79(19) |
| O(7) <sup>#1</sup> –Cu(2)–N(1)               | 92.76(17)  | N(11)–Cu(5)–O(10) <sup>#3</sup>              | 88.84(15)  |
| O(6)–Cu(2)–N(9) <sup>#2</sup>                | 88.56(16)  | N(11)–Cu(5)–O(10)                            | 91.16(15)  |
| O(7) <sup>#1</sup> –Cu(2)–N(9) <sup>#2</sup> | 89.82(17)  | O(3) <sup>#4</sup> –Cu(6)–N(6)               | 93.03(19)  |
| O(6)–Cu(2)–O(9)                              | 105.66(16) | O(3) <sup>#4</sup> –Cu(6)–N(10)              | 87.16(19)  |
| O(7) <sup>#1</sup> –Cu(2)–O(9)               | 97.72(15)  | O(3) <sup>#4</sup> –Cu(6)–O(8) <sup>#5</sup> | 143.91(17) |
| N(1)–Cu(2)–O(9)                              | 86.98(17)  | N(6)–Cu(6)–O(8) <sup>#5</sup>                | 92.98(18)  |
| N(9) <sup>#2</sup> –Cu(2)–O(9)               | 89.04(16)  | N(10)–Cu(6)–O(8) <sup>#5</sup>               | 90.29(17)  |
| N(8)–Cu(3)–O(9) <sup>#2</sup>                | 91.01(16)  | O(3) <sup>#4</sup> –Cu(6)–O(10)              | 121.80(16) |
| N(8)–Cu(3)–O(9)                              | 88.99(16)  | N(6)–Cu(6)–O(10)                             | 87.09(15)  |
| N(8)–Cu(3)–O(5)                              | 87.22(15)  | N(10)–Cu(6)–O(10)                            | 87.83(15)  |
| N(8) <sup>#2</sup> –Cu(3)–O(5)               | 92.79(15)  | O(8) <sup>#5</sup> –Cu(6)–O(10)              | 94.03(15)  |
| O(9) <sup>#2</sup> –Cu(3)–O(5)               | 101.97(13) | N(5)–Cu(4)–N(3)                              | 84.18(18)  |

<sup>a</sup> Symmetry codes: <sup>#1</sup>  $-x, 2-y, -z$ ; <sup>#2</sup>  $-x, 1-y, -z$ ; <sup>#3</sup>  $1-x, 1-y, 1-z$ ; <sup>#4</sup>  $x+1, y, z$ ; <sup>#5</sup>  $1-x, 2-y, -z$ .

**Table S4** Selected bond lengths (Å) and angles (°) for **4**<sup>a</sup>

|                                |            |                                              |            |
|--------------------------------|------------|----------------------------------------------|------------|
| Cu(1)–O(5)                     | 1.8872(18) | Cu(2)–O(3) <sup>#2</sup>                     | 1.9722(17) |
| Cu(1)–O(6)                     | 1.9353(17) | Cu(2)–N(3) <sup>#1</sup>                     | 1.984(2)   |
| Cu(1)–O(2)                     | 1.9353(18) | Cu(2)–O(6)                                   | 2.2555(18) |
| Cu(1)–O(3) <sup>#2</sup>       | 2.6166(2)  | Cu(2)–O(6) <sup>#1</sup>                     | 1.9588(18) |
| Cu(1)–N(2)                     | 1.957(2)   | Cu(2)–O(1)                                   | 1.9516(18) |
| Cu(3)–O(5)                     | 1.9019(19) | Cu(3)–N(1)                                   | 1.997(2)   |
| O(5)–Cu(1)–O(2)                | 89.66(8)   | O(6) <sup>#1</sup> –Cu(2)–N(3) <sup>#1</sup> | 88.69(8)   |
| O(6)–Cu(1)–O(2)                | 97.45(7)   | O(1)–Cu(2)–N(3) <sup>#1</sup>                | 89.01(8)   |
| O(5)–Cu(1)–N(2)                | 86.80(8)   | O(6) <sup>#1</sup> –Cu(2)–O(3) <sup>#2</sup> | 92.71(7)   |
| O(6)–Cu(1)–N(2)                | 86.81(8)   | O(1)–Cu(2)–O(6)                              | 97.47(7)   |
| O(3) <sup>#2</sup> –Cu(2)–O(6) | 89.04(7)   | O(6) <sup>#1</sup> –Cu(2)–O(6)               | 81.79(7)   |
| N(3) <sup>#1</sup> –Cu(2)–O(6) | 103.24(8)  | O(5)–Cu(3)–N(1) <sup>#3</sup>                | 91.69(8)   |
| O(1)–Cu(2)–O(3) <sup>#2</sup>  | 89.82(8)   | O(5)–Cu(3)–N(1)                              | 88.31(8)   |

<sup>a</sup> Symmetry codes: <sup>#1</sup>  $-x, -y, 1-z$ ; <sup>#2</sup>  $1-x, -y, 1-z$ ; <sup>#3</sup>  $1-x, 1-y, 1-z$ .

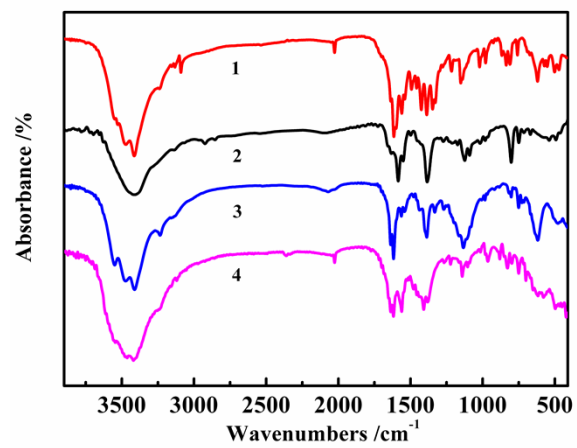

**Fig. S1** FT-IR spectra of 1–4.

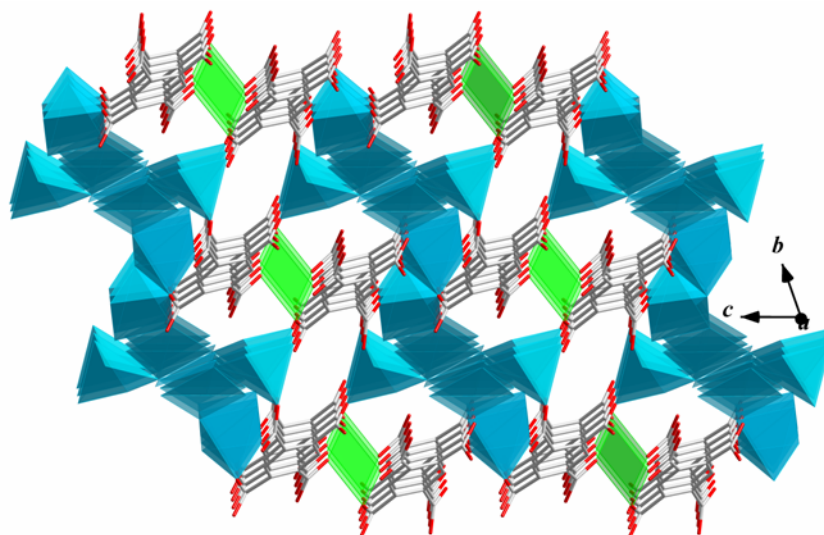

**Fig. S2** 3D framework of **1**.

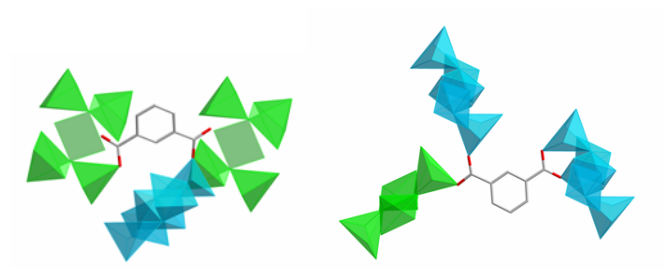

**Fig. S3** Connectivity of Cu<sup>II</sup><sub>5</sub> cluster and ip<sup>2-</sup> ligand in **3**.

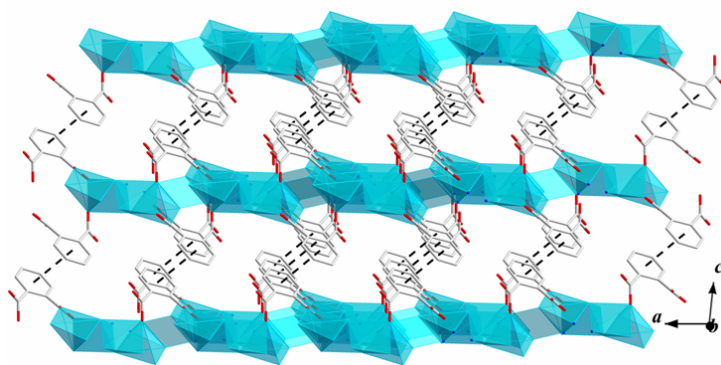

**Fig. S4** 3D supramolecular structure for **4**.



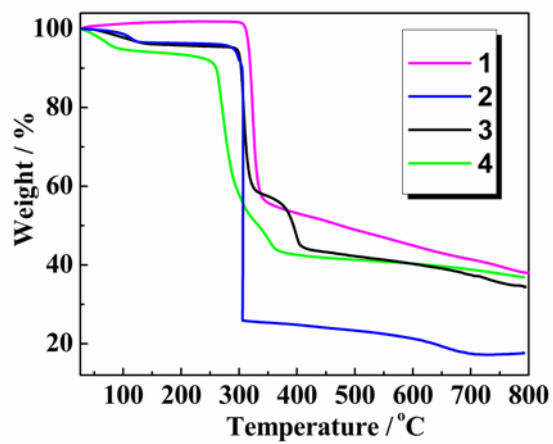

Fig. S5 TGA of 1-4.

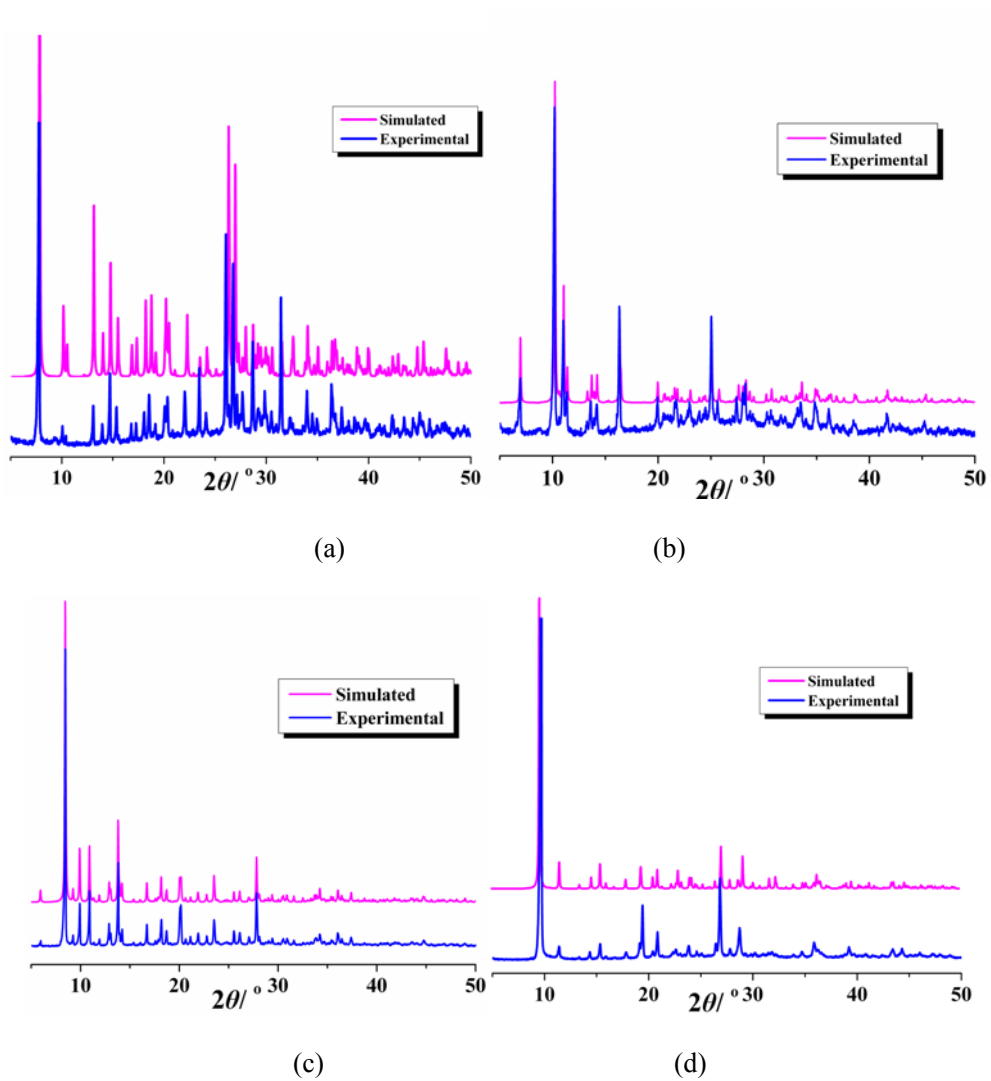

**Fig. S6** Simulated (purple) and experimental (blue) PXRD patterns for **1(a)–4(d)**.

**Table S5** Magnetostructural parameters for **1**

| Coupling constant | Pathway           | $r_{\text{Cu}\cdots\text{Cu}} / (\text{\AA})$ | $\theta / ^\circ$ | $\angle\text{CuOCu} / ^\circ$ | $\angle\text{CuNN} / ^\circ$ |
|-------------------|-------------------|-----------------------------------------------|-------------------|-------------------------------|------------------------------|
| $J_1$             | Cu1 $\cdots$ Cu3  | 3.3935(5)                                     | 2.744             | 125.319(12)                   | 123.750(14)<br>118.709(15)   |
|                   | Cu2A $\cdots$ Cu3 | 3.4231(5)                                     | 15.423            | 115.499(12)                   | 125.028(15)<br>118.780(16)   |
|                   | Cu2A $\cdots$ Cu4 | 3.3599(8)                                     | 16.576            | 113.910(11)                   | 125.050(16)<br>117.331(15)   |
|                   | Cu3 $\cdots$ Cu4  | 3.2215(6)                                     | 31.450            | 108.251(12)                   | 124.092(17)<br>113.494(14)   |
| $J_2$             | Cu1 $\cdots$ Cu2A | 5.6892(10)                                    | 12.693            |                               |                              |
|                   | Cu2 $\cdots$ Cu3  | 5.6229(9)                                     | 15.423            |                               |                              |

\* $\theta$  represents the dihedral angle of two Cu<sup>II</sup> ion-generated planes.

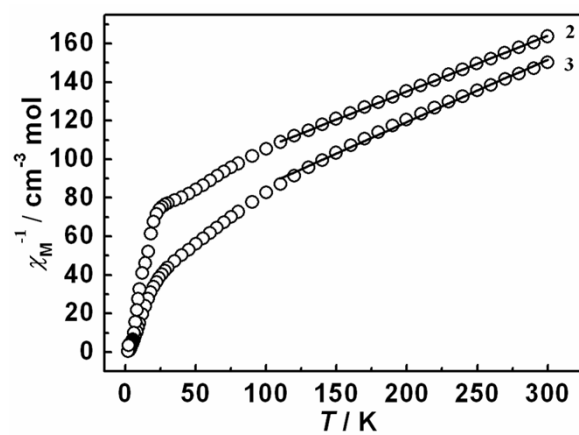

**Fig. S7** Temperature dependence of  $\chi_M T$  for **2** and **3** (The solid line represents the best fit to Curie-Weiss law).

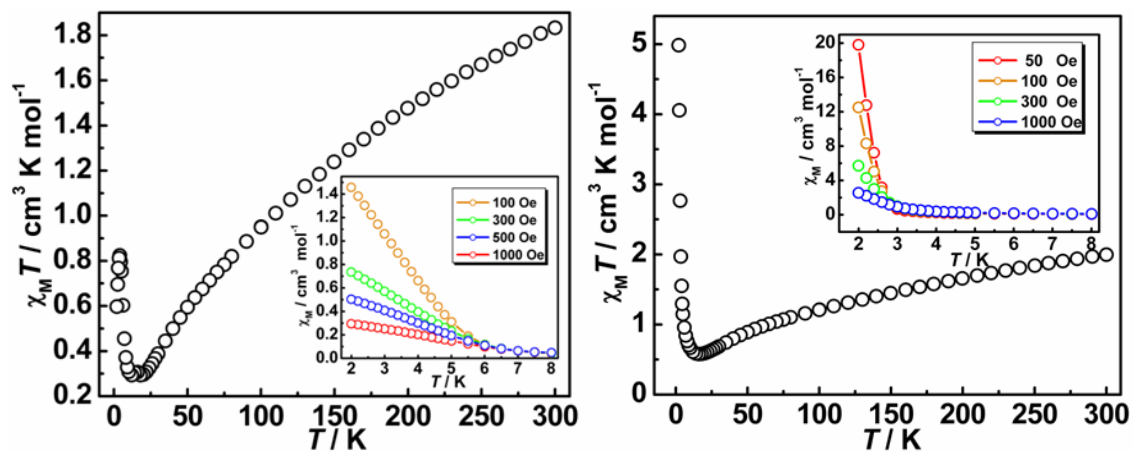

**Fig. S8** Temperature dependence of  $\chi_M T$  for **2** and **3** (inset: temperature-dependence of the field-cooled magnetic susceptibility at various magnetic fields).
